# Supplementary material for: Sarcopenia and Mortality in Older Hemodialysis Patients
Source: MDPI journal article supplement (doi:10.3390/nu14112354), 2022-06-05
Supplement: s1 [file s1]

**Table S1. Characteristics of patients alive or deceased at 2 years according to sex. Data shown as mean  $\pm$  SD, n (%).**

|                                      | Male                |                        |                  | Female              |                       |              |
|--------------------------------------|---------------------|------------------------|------------------|---------------------|-----------------------|--------------|
|                                      | Alive<br>n=19 (46%) | Deceased<br>n=22 (54%) | p value          | Alive<br>n=11 (58%) | Deceased<br>n=8 (42%) | p value      |
| <i>Demographic data</i>              |                     |                        |                  |                     |                       |              |
| Age (years)                          | 78.7 $\pm$ 4.5      | 83.6 $\pm$ 5.8         | <b>0.005</b>     | 81.9 $\pm$ 5.1      | 84.5 ( $\pm$ 5.4)     | 0.32         |
| Dialysis vintage (months)            | 44.5 $\pm$ 41.2     | 51.4 $\pm$ 39.1        | 0.585            | 53.9 $\pm$ 45.5     | 52.3 ( $\pm$ 42)      | 0.558        |
| <i>Comorbidities</i>                 |                     |                        |                  |                     |                       |              |
| Diabetes                             | 9.0 (47.4%)         | 9.0 (40.9%)            | 0.78             | 9.0 (81.8%)         | 4.0 (50.0%)           | 0.141        |
| Cardiovascular disease               | 11.0 (57.9%)        | 21.0 (95.5%)           | <b>0.004</b>     | 4.0 (36.4%)         | 4.0 (50.0%)           | 0.552        |
| Malignancy                           | 6.0 (31.6%)         | 11.0 (50.0%)           | 0.233            | 3.0 (27.3%)         | 1.0 (12.5%)           | 0.435        |
| <i>Analytical data</i>               |                     |                        |                  |                     |                       |              |
| Albumin (g/dl)                       | 3.7 $\pm$ 0.4       | 3.7 $\pm$ 0.4          | 0.476            | 3.7 $\pm$ 0.4       | 3.4 $\pm$ 0.8         | 0.284        |
| Hemoglobin (g/dl)                    | 11.5 $\pm$ 1.1      | 11.3 $\pm$ 1.0         | 0.682            | 11.6 $\pm$ 0.9      | 10.8 $\pm$ 1.3        | 0.119        |
| C Reactive Protein (mg/L)            | 0.8 $\pm$ 0.7       | 2.3 $\pm$ 3.8          | 0.088            | 0.7 $\pm$ 0.7       | 3.0 $\pm$ 3.7         | 0.055        |
| 25OH Vitamin D <sub>3</sub> (ng/ml)  | 18.4 $\pm$ 8.7      | 23.6 $\pm$ 15.7        | 0.207            | 20.9 $\pm$ 12.8     | 24.2 $\pm$ 15.8       | 0.621        |
| Kt/V <sub>urea</sub>                 | 1.7 $\pm$ 0.4       | 1.7 $\pm$ 0.4          | 0.546            | 2.1 $\pm$ 0.3       | 1.9 $\pm$ 0.3         | 0.061        |
| <i>Anthropometric data</i>           |                     |                        |                  |                     |                       |              |
| Body mass index (kg/m <sup>2</sup> ) | 26.5 $\pm$ 4.1      | 25.1 $\pm$ 2.6         | 0.190            | 23.8 $\pm$ 4.3      | 24.4 $\pm$ 3.7        | 0.766        |
| Mid-Upper Arm Circumference (cm)     | 27.5 $\pm$ 2.8      | 25.9 $\pm$ 2.3         | 0.065            | 25.4 $\pm$ 3.5      | 26.2 $\pm$ 2.6        | 0.621        |
| Waist Perimeter (cm)                 | 96.7 $\pm$ 7.1      | 97.2 $\pm$ 8.2         | 0.841            | 84.9 $\pm$ 12.9     | 82.3 $\pm$ 2.0        | 0.612        |
| Hip Perimeter (cm)                   | 102.3 $\pm$ 7.3     | 101.0 $\pm$ 6.7        | 0.557            | 96.4 $\pm$ 8.7      | 101.5 $\pm$ 4.2       | 0.178        |
| Waist hip index                      | 0.9 $\pm$ 0.0       | 1.0 $\pm$ 0.1          | 0.424            | 0.9 $\pm$ 0.1       | 0.8 $\pm$ 0.0         | <b>0.028</b> |
| Tricipital Fold (mm)                 | 1.2 $\pm$ 0.5       | 1.0 $\pm$ 0.3          | 0.296            | 1.3 $\pm$ 0.5       | 1.6 $\pm$ 0.4         | 0.300        |
| Abdominal Fold (mm)                  | 21.0 $\pm$ 7.6      | 18.4 $\pm$ 5.8         | 0.337            | 15.6 $\pm$ 4.9      | 16.1 $\pm$ 3.8        | 0.866        |
| Subscapular Fold (mm)                | 17.0 $\pm$ 6.8      | 15.9 $\pm$ 6.7         | 0.641            | 13.5 $\pm$ 9.5      | 12.8 $\pm$ 3.8        | 0.865        |
| <i>Body composition</i>              |                     |                        |                  |                     |                       |              |
| Muscle Mass (kg)                     | 22.8 $\pm$ 2.8      | 19.4 $\pm$ 2.7         | <b>&lt;0.001</b> | 15.1 $\pm$ 1.7      | 16.2 $\pm$ 2.1        | 0.205        |
| Fast Mass (kg)                       | 23.7 $\pm$ 6.1      | 22.2 $\pm$ 4.1         | 0.342            | 21.5 $\pm$ 8.8      | 22.7 $\pm$ 5.5        | 0.741        |
| Total Body Water (l)                 | 37.7 $\pm$ 4.4      | 33.6 $\pm$ 5.1         | <b>0.009</b>     | 24.8 $\pm$ 3.1      | 26.9 $\pm$ 3.0        | 0.158        |
| Overhydration (l)                    | 1.1 $\pm$ 1.7       | 1.3 $\pm$ 1.5          | 0.728            | 0.7 $\pm$ 1.5       | 0.8 $\pm$ 0.9         | 0.787        |

\*p<0.05 in bold. \*\*p Male vs Female

**Table S2.** Univariate hazard ratio (HR), 95% confidence interval (95% CI) for all-cause death by diagnostic algorithm.

| Variable                                | Value | n (%)     | HR (95% CI)                          |
|-----------------------------------------|-------|-----------|--------------------------------------|
| GSD                                     | N     | 15 (27.3) | -                                    |
|                                         | Y     | 40 (72.7) | 3.80 (0.51-28.11, p=0.411)           |
| STS5                                    | N     | 7 (11.7)  | -                                    |
|                                         | Y     | 53 (88.3) | 2.31 (0.55-9.72, p=0.252)            |
| GSD+ASM                                 | N     | 37 (61.7) | -                                    |
|                                         | Y     | 23 (38.3) | <b>3.00 (1.44-6.24, p=0.003)</b>     |
| STS5+ASM                                | N     | 38 (63.3) | -                                    |
|                                         | Y     | 22 (36.7) | 2.76 (1.34-5.71, p=0.006)            |
| GSD &/or STS5+ ASM                      | N     | 36 (60.0) | -                                    |
|                                         | Y     | 24 (40.0) | 2.68 (1.29-5.57, p=0.008)            |
| GSD+ASM+GS                              | N     | 41 (68.3) | -                                    |
|                                         | Y     | 19 (31.7) | <b>3.33 (1.61-6.89, p=0.001)</b>     |
| STS5+ASM+GS                             | N     | 41 (68.3) | -                                    |
|                                         | Y     | 19 (31.7) | <b>3.33 (1.61-6.89, p=0.001)</b>     |
| GSD &/or STS5+ASM+GS                    | N     | 41 (68.3) | -                                    |
|                                         | Y     | 19 (31.7) | <b>3.33 (1.61-6.89, p=0.001)</b>     |
| GSD+ASM+TUG                             | N     | 49 (81.7) | -                                    |
|                                         | Y     | 11 (18.3) | <b>5.60 (2.49-12.58, p&lt;0.001)</b> |
| STS5+ASM+TUG                            | N     | 49 (81.7) | -                                    |
|                                         | Y     | 11 (18.3) | <b>5.60 (2.49-12.58, p&lt;0.001)</b> |
| GDS &/or STS5+ASM+TUG                   | N     | 49 (81.7) | -                                    |
|                                         | Y     | 11 (18.3) | <b>5.60 (2.49-12.58, p&lt;0.001)</b> |
| GSD+ASM+SPPB                            | N     | 40 (66.7) | -                                    |
|                                         | Y     | 20 (33.3) | <b>2.95 (1.43-6.09, p=0.003)</b>     |
| STS5+ASM+SPPB                           | N     | 39 (65.0) | -                                    |
|                                         | Y     | 21 (35.0) | 2.60 (1.26-5.37, p=0.009)            |
| GDS &/or STS5+ASM+SPPB                  | N     | 39 (65.0) | -                                    |
|                                         | Y     | 21 (35.0) | 2.60 (1.26-5.37, p=0.009)            |
| GDS &/or STS5+ASM+GS &/or TUG &/or SPPB | N     | 38 (63.3) | -                                    |
|                                         | Y     | 22 (36.7) | 2.76 (1.34-5.71, p=0.006)            |

N: no, Y: yes

**Figure S1.** Survival according to EGWSOP2 criteria at 24 months for non-COVID-19 mortality. COVID-19 deaths were censored

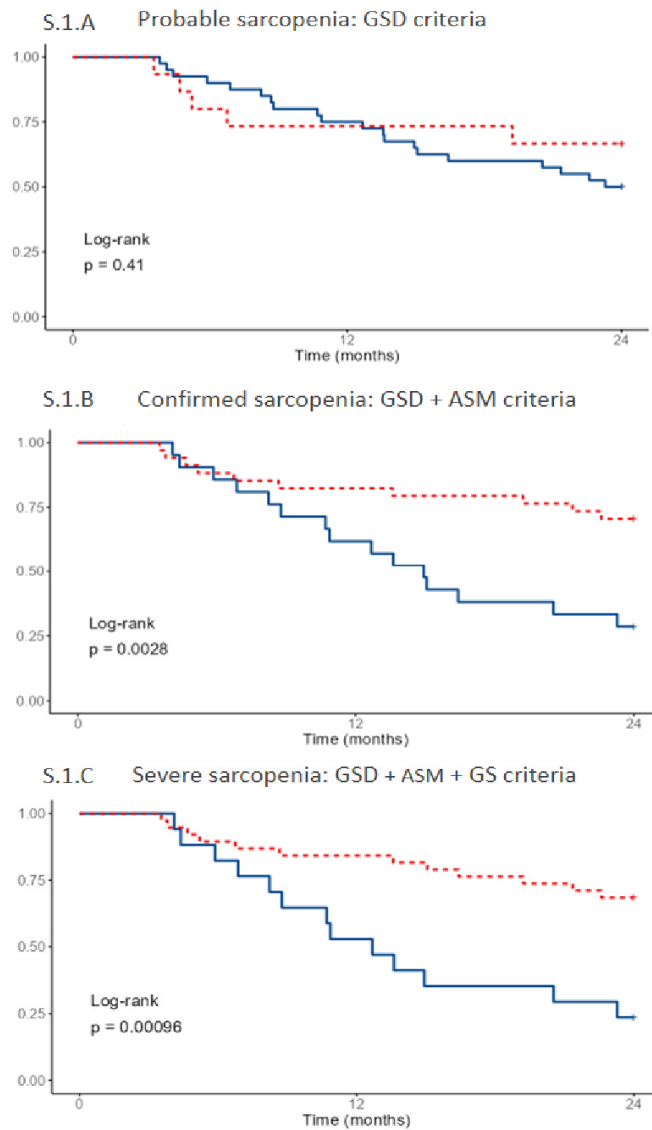

Vertical axis shows survival. Probable of severe sarcopenia in blue, no sarcopenia in discontinuous red. Survivors,  $n=30$ . Deceased,  $n=25$ . GSD: grip strength by dynamometry, ASM: appendicular skeletal muscle mass, GS: gait speed.

**Figure S2.** Non-COVID-19 multivariate mortality risk according to EGWSOP2 criteria at 24 months. Data shown as hazard ratio and 95% confidence interval.

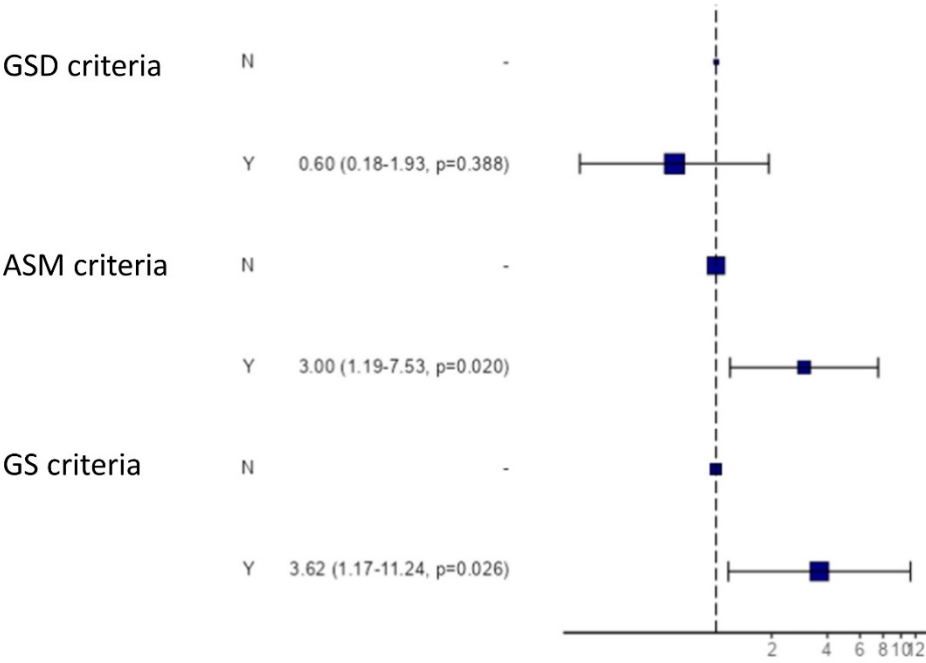

Survivors, n=30. Deceased, n=25. GSD: grip strength by dynamometry, ASM: appendicular skeletal muscle mass, GS: gait speed.
